# Supplementary material for: Depletion of Human Histone H1 Variants Uncovers Specific Roles in Gene Expression and Cell Growth
Source: PubMed Central journal article supplement (PMC2563032; doi:10.1371/journal.pgen.1000227), 2008-10-17
Supplement: pgen.1000227.s003.pdf [file pgen.1000227.s003.pdf]

**A**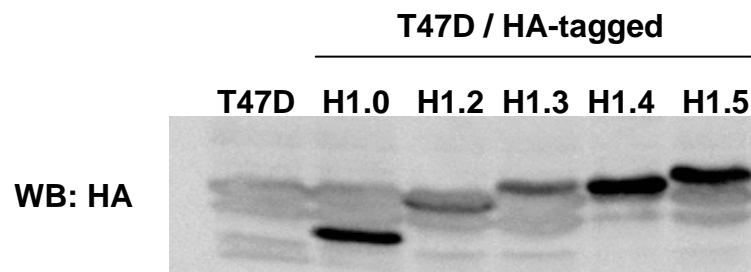**B**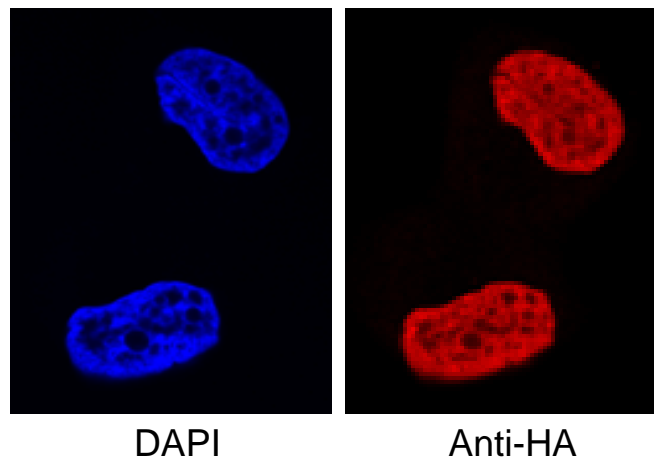**C**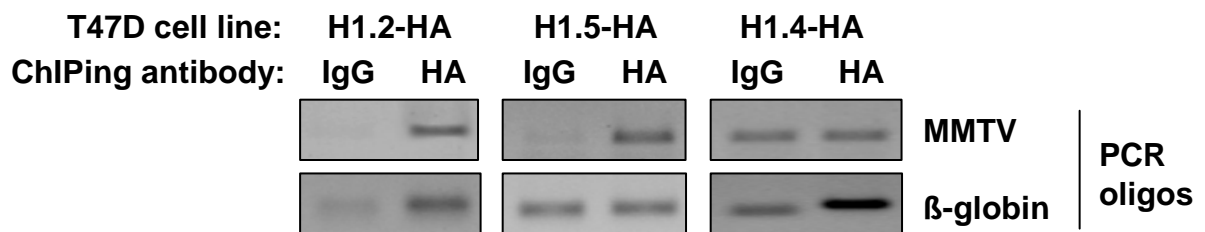**Figure S3**
