# Supplementary material for: Depletion of Human Histone H1 Variants Uncovers Specific Roles in Gene Expression and Cell Growth
Source: PubMed Central journal article supplement (PMC2563032; doi:10.1371/journal.pgen.1000227), 2008-10-17
Supplement: pgen.1000227.s005.pdf [file pgen.1000227.s005.pdf]

**Table S1. Cell cycle profile after PI staining of H1 variant KD cell lines grown in the presence or absence of Dox.** See legends of Figures 2C and 2E for a full description of the experimental procedure.

Data for Fig. 2C

|           | Dox | G1-phase     | S-phase      | G2-phase     |
|-----------|-----|--------------|--------------|--------------|
| controlsh | -   | 68.88 ± 1.83 | 9.10 ± 0.80  | 20.62 ± 1.14 |
|           | +   | 67.45 ± 3.00 | 8.43 ± 1.86  | 22.05 ± 4.05 |
| H1.0sh    | -   | 70.89 ± 1.46 | 9.02 ± 0.61  | 18.76 ± 0.61 |
|           | +   | 70.15 ± 2.76 | 9.65 ± 1.42  | 18.69 ± 1.35 |
| H1.2sh    | -   | 68.56 ± 0.93 | 10.87 ± 0.04 | 19.77 ± 0.93 |
|           | +   | 82.36 ± 2.83 | 4.17 ± 0.39  | 12.63 ± 2.66 |
| H1.3sh    | -   | 69.67 ± 1.99 | 8.92 ± 1.57  | 19.96 ± 0.17 |
|           | +   | 69.00 ± 1.08 | 8.00 ± 0.28  | 21.45 ± 1.16 |
| H1.4sh    | -   | 72.63 ± 0.13 | 9.00 ± 0.03  | 17.34 ± 0.76 |
|           | +   | 75.05 ± 3.92 | 2.30 ± 0.37  | 21.73 ± 3.81 |
| H1.5sh    | -   | 69.16 ± 1.29 | 11.19 ± 2.47 | 18.04 ± 1.92 |
|           | +   | 71.10 ± 2.41 | 5.78 ± 1.62  | 21.82 ± 2.07 |

Data for Fig. 2E

H1.2sh KD

| FBS (h) | Dox | G1-phase     | S-phase      | G2-phase     |
|---------|-----|--------------|--------------|--------------|
| 0       | -   | 88.07 ± 1.46 | 2.53 ± 0.53  | 11.23 ± 1.52 |
| 24      | -   | 42.58 ± 0.82 | 32.20 ± 0.13 | 23.40 ± 1.34 |
| 30      | -   | 39.67 ± 4.24 | 18.59 ± 0.41 | 39.85 ± 4.70 |
| 48      | -   | 66.37 ± 3.49 | 11.66 ± 0.57 | 20.64 ± 2.35 |
| 0       | +   | 85.34 ± 1.54 | 2.58 ± 0.40  | 11.87 ± 1.22 |
| 24      | +   | 85.40 ± 0.41 | 5.67 ± 0.87  | 7.93 ± 0.64  |
| 30      | +   | 71.37 ± 4.40 | 14.35 ± 1.77 | 12.57 ± 2.31 |
| 48      | +   | 72.11 ± 2.09 | 5.65 ± 0.28  | 20.85 ± 1.00 |
